# Supplementary material for: Trichomonas vaginalis and HIV infection acquisition: a systematic review and meta-analysis
Source: PubMed Central journal article supplement — Sex Transm Infect. 2018 Oct 19;95(1):36–42. doi: 10.1136/sextrans-2018-053713 (PMC6580735; doi:10.1136/sextrans-2018-053713), 2018-10-19
Supplement: sextrans-2018-053713supp001.pdf [file sextrans-2018-053713supp001.pdf]

**Supplementary Figure 1. Quality assessment using an adapted Newcastle-Ottawa Scale for risk of bias of studies (n = 19) included in the systematic review**

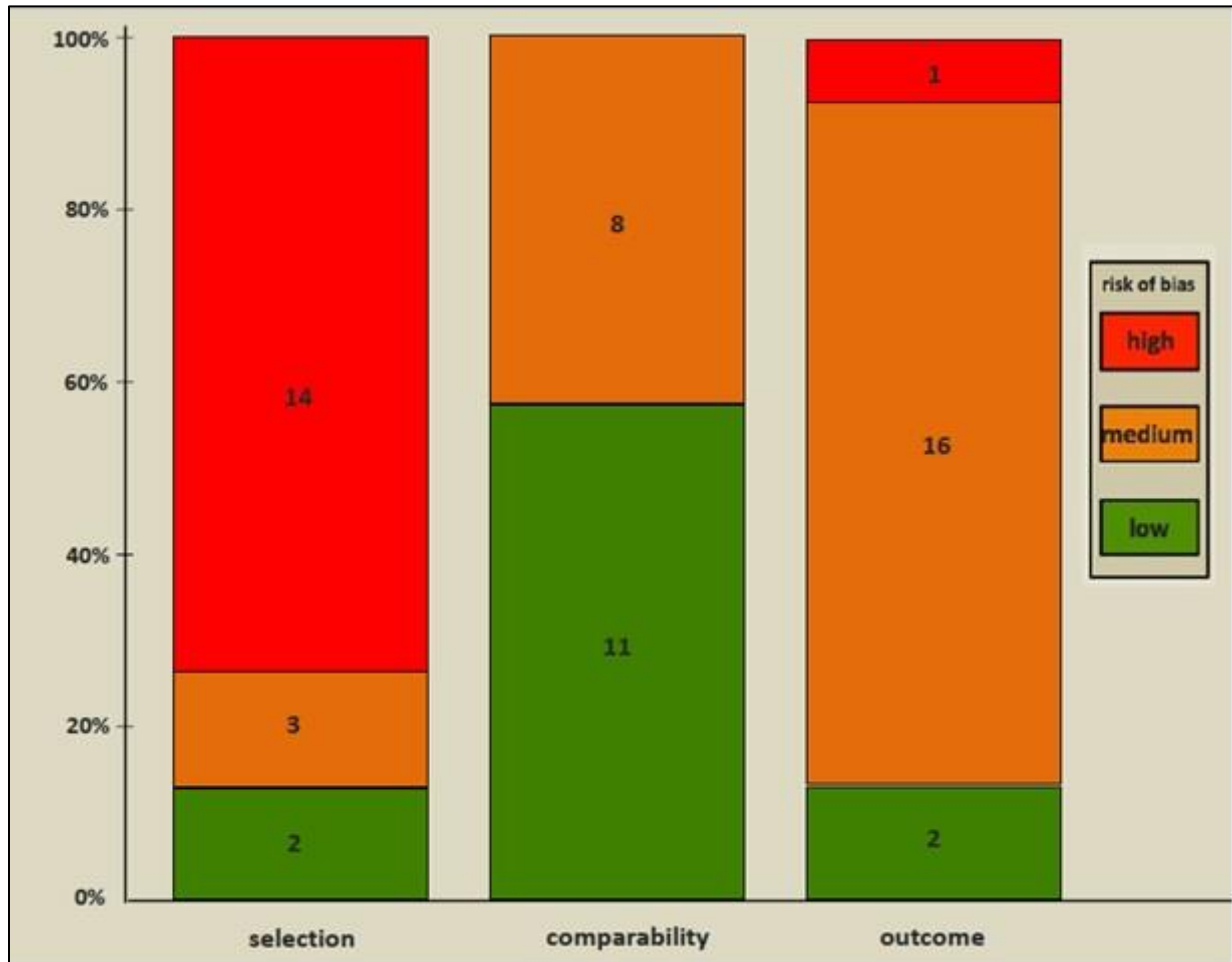

**Legend.** Quality assessment using an adapted Newcastle-Ottawa Scale for risk of bias of studies included in the systematic review for studies (n=19) reporting an association between *Trichomonas vaginalis* infection and HIV infection acquisition. The absolute numbers of studies are shown in the boxes.

**Supplementary Table 1. TOOL FOR EVALUATION OF RISK OF BIAS IN INDIVIDUAL STUDIES**

|                                                                                                                                                                                                                                                                                                                                                                                                                                                                                                               |
|---------------------------------------------------------------------------------------------------------------------------------------------------------------------------------------------------------------------------------------------------------------------------------------------------------------------------------------------------------------------------------------------------------------------------------------------------------------------------------------------------------------|
| <b>SELECTION</b>                                                                                                                                                                                                                                                                                                                                                                                                                                                                                              |
| <p><b>1. Representativeness of the group tested for <i>Trichomonas vaginalis</i> &amp; HIV</b></p> <p>a) Truly representative of people in the community ***<br/> b) Somewhat representative of the community **<br/> c) Selected group people *<br/> d) No description</p>                                                                                                                                                                                                                                   |
| <b>COMPARABILITY</b>                                                                                                                                                                                                                                                                                                                                                                                                                                                                                          |
| <p><b>2. The subjects in different comparison groups are comparable, based on the study design or analysis</b></p> <p>a) Controlling for confounding factors (logistic regression or propensity scoring) **<br/> b) Subjects in different groups are comparable *<br/> c) No reporting on comparability between comparison groups and no control for confounding</p>                                                                                                                                          |
| <b>OUTCOME</b>                                                                                                                                                                                                                                                                                                                                                                                                                                                                                                |
| <p><b>3. Ascertainment of infection with either <i>Trichomonas vaginalis</i> or HIV</b></p> <p>a) Both ascertained by validated, highly specific and sensitive assays performed for the study ***<br/> b) Either <i>T. vaginalis</i> or HIV ascertained by validated moderate specific and sensitive assays performed for the study while the other is through medical records**<br/> c) Both ascertained through medical records *<br/> d) Self-reported without further documentation/ assay not stated</p> |

**RISK OF BIAS**

Selection: 3 stars, low risk of bias; 2 stars, medium risk of bias; 0 or 1 star(s), high risk of bias

Comparability: 2 stars, low risk of bias; 1 star, medium risk of bias; 0 stars, high risk of bias

Outcome: 3 stars, low risk of bias; 2 or 1 star(s), medium risk of bias; 0 stars, high risk of bias

**Supplementary Table 2: Individual study summary of risk of bias assessment**

| <b>Author &amp; Year</b>             | <b>Selection Interpretation</b> | <b>Comparability Interpretation</b> | <b>Outcome Interpretation</b> |
|--------------------------------------|---------------------------------|-------------------------------------|-------------------------------|
| Delany-Moretlwe <i>et al.</i> (2011) | high                            | medium                              | high                          |
| Ghys <i>et al.</i> (2001)            | high                            | low                                 | medium                        |
| Hester <i>et al.</i> (2003)          | high                            | medium                              | medium                        |
| Kinuthia <i>et al.</i> (2015)        | high                            | medium                              | medium                        |
| Kleinschmidt <i>et al.</i> (2007)    | medium                          | low                                 | medium                        |
| Laga <i>et al.</i> (1993)            | high                            | medium                              | medium                        |
| Laga <i>et al.</i> (1994)            | high                            | low                                 | medium                        |
| Martin <i>et al.</i> (1998)          | high                            | medium                              | medium                        |
| Masese <i>et al.</i> (2015)          | high                            | low                                 | medium                        |
| Mavedzenge <i>et al.</i> (2010)      | low                             | low                                 | low                           |
| McClelland <i>et al.</i> (2005)      | high                            | medium                              | medium                        |
| McClelland <i>et al.</i> (2007)      | high                            | low                                 | medium                        |
| Myer <i>et al.</i> (2006)            | low                             | medium                              | medium                        |
| Nagot <i>et al.</i> (2005)           | high                            | medium                              | medium                        |
| Quinn <i>et al.</i> (2000)           | high                            | low                                 | medium                        |
| Taha <i>et al.</i> (1998)            | medium                          | low                                 | medium                        |
| van de Wijgert <i>et al.</i> (2009)  | medium                          | low                                 | medium                        |
| Van Der Pol <i>et al.</i> (2008)     | high                            | low                                 | low                           |
| Vandepitte <i>et al.</i> (2013)      | high                            | low                                 | medium                        |

Legend: Studies are arranged alphabetically according to the first authors name and year.
