# Supplementary material for: Trichomonas vaginalis and HIV infection acquisition: a systematic review and meta-analysis
Source: PubMed Central journal article supplement — Sex Transm Infect. 2018 Oct 19;95(1):36–42. doi: 10.1136/sextrans-2018-053713 (PMC6580735; doi:10.1136/sextrans-2018-053713), 2018-10-19
Supplement: sextrans-2018-053713supp002.pdf [file sextrans-2018-053713supp002.pdf]

- w1. Garber GE. The laboratory diagnosis of *Trichomonas vaginalis*. *The Canadian Journal of Infectious Diseases & Medical Microbiology* 2005;16(1):35-38.
- w2. Gilbert RO, Elia G, Beach DH, et al. Cytopathogenic effect of *Trichomonas vaginalis* on human vaginal epithelial cells cultured in vitro. *Infection and immunity* 2000;68(7):4200-6. [published Online First: 2000/06/17]
- w3. Alderete JF, Garza GE. Identification and properties of *Trichomonas vaginalis* proteins involved in cytoadherence. *Infection and immunity* 1988;56(1):28-33. [published Online First: 1988/01/01]
- w4. Krieger JN, Poisson MA, Rein MF. Beta-hemolytic activity of *Trichomonas vaginalis* correlates with virulence. *Infection and immunity* 1983;41(3):1291-5. [published Online First: 1983/09/01]
- w5. Mallinson DJ, Lockwood BC, Coombs GH, et al. Identification and molecular cloning of four cysteine proteinase genes from the pathogenic protozoon *Trichomonas vaginalis*. *Microbiology* 1994;140 ( Pt 10):2725-35. doi: 10.1099/00221287-140-10-2725 [published Online First: 1994/10/01]
- w6. Fichorova RN, Trifonova RT, Gilbert RO, et al. *Trichomonas vaginalis* lipophosphoglycan triggers a selective upregulation of cytokines by human female reproductive tract epithelial cells. *Infection and immunity* 2006;74(10):5773-9. doi: 10.1128/IAI.00631-06
- w7. Levine WC, Pope V, Bhoomkar A, et al. Increase in endocervical CD4 lymphocytes among women with nonulcerative sexually transmitted diseases. *Journal of Infectious Diseases* 1998;177(1):167-74. doi: 10.1086/513820

- w8. Rathod SD, Krupp K, Klausner JD, et al. Bacterial Vaginosis and Risk for *Trichomonas vaginalis* Infection: A Longitudinal Analysis. *Sexually Transmitted Diseases* 2011;38(9):882-86. doi: 10.1097/OLQ.0b013e31821f91a1
- w9. Masson L, Mlisana K, Little F, et al. Defining genital tract cytokine signatures of sexually transmitted infections and bacterial vaginosis in women at high risk of HIV infection: a cross-sectional study. *Sexually transmitted infections* 2014;90(8):580-7. doi: 10.1136/sextrans-2014-051601 [published Online First: 2014/08/12]
- w10. Anderson BL, Firnhaber C, Liu T, et al. Effect of trichomoniasis therapy on genital HIV viral burden among African women. *Sexually Transmitted Diseases* 2012;39(8):638-42. doi: 10.1097/OLQ.0b013e31825725ad
- w11. Bochner AF, Baeten JM, Rustagi AS, et al. A cross-sectional analysis of *Trichomonas vaginalis* infection among heterosexual HIV-1 serodiscordant African couples. *Sexually transmitted infections* 2017;93(7):520-29. doi: 10.1136/sextrans-2016-053034 [published Online First: 2017/04/06].
